1 The association between dietary habits and periodontal disease in young adult

2 women

3

4 Short title: Dietary habits and periodontal disease

5

6 Akemi Hosoda<sup>1,2</sup>, Yuriko Komagamine<sup>1\*</sup>, Manabu Kanazawa<sup>1</sup>, Yohei Hama<sup>1</sup>,

7 Akiko Kojo<sup>2</sup>, Shunsuke Minakuchi<sup>1</sup>

8

9 <sup>1</sup>Gerodontology and Oral Rehabilitation, Graduate School of Medical and Dental

10 Sciences, Tokyo Medical and Dental University, Tokyo, Japan

11 <sup>2</sup>Division of Medical Nutrition, Faculty of Healthcare, Tokyo Healthcare

12 University, Tokyo, Japan

13

14 \*Corresponding author

15 Email: [y.komagamine.gerd@tmd.ac.jp](mailto:y.komagamine.gerd@tmd.ac.jp)

17 **Abstract**

18 **Background**

19 Among middle-aged and elderly individuals, dietary habits have previously been  
20 reported to differ between patients with and without periodontal disease.  
21 However, in young adults, there are only a few reports that show a correlation  
22 between nutrient/food intake and periodontal disease. Moreover, no report has  
23 assessed the correlation between dietary habits measured by a  
24 self-administered diet history questionnaire (DHQ) and periodontal disease.  
25 Therefore, we assessed the correlation between dietary habits, determined  
26 using a DHQ, and periodontal disease in young adult women who are likely to  
27 develop a periodontal disease.

28 **Methods**

29 The participants were 120 healthy, non-smoking, female college students (mean  
30 age,  $20.4 \pm 1.1$  years) from two universities who did not have any systemic  
31 disease. The participants were assessed for periodontal disease according to  
32 community periodontal index (CPI) and were divided into two groups. Subjects  
33 with a CPI code of 0, 1, or 2 were assigned to non-periodontal disease group  
34 (non-PD), and subjects with a CPI code of 3 or 4 were assigned to periodontal

35 disease group (PD). Dietary habits were assessed using a DHQ. In addition,  
36 physical status, level of difficulty in chewing food (dietary hardness), masticatory  
37 performance, and quality of life (QoL) were assessed.

## 38 **Results**

39 The PD group had a significantly lower nutrient intake of minerals, fat,  
40 water-soluble vitamins, and dietary fiber than the non-PD group. In terms of food  
41 groups, the PD group consumed significantly lesser amounts of green and  
42 yellow vegetables than the non-PD group. In addition, the PD group consumed  
43 significantly lesser amounts of hard foods than the non-PD group.

## 44 **Conclusion**

45 Young adult women with a periodontal disease had a significantly lower  
46 nutrient/food intake than young adult women without a periodontal disease.

## 47 **1. Introduction**

48 Periodontal disease is a chronic inflammatory disease that begins in the gingiva  
49 and spreads throughout the periodontal tissues, culminating to its destruction [1].

50 Periodontal disease occurs in young adulthood and progresses with age [2].

51 According to the results of the Survey of Dental Diseases 2016, the percentage  
52 of persons in Japan with periodontal pockets of  $\geq 4$  mm increased with age [3].

53 Moreover, since 17.6% individuals aged 15-24 years and 32.4% individuals

54 aged 25-34 years have periodontal pockets of  $\geq 4$  mm, periodontal disease is

55 now known to be common among the elderly and the young adults. Among

56 middle-aged individuals, the prevalence of periodontal disease is higher in

57 women than in men. The decrease in estrogen levels after menopause leads to

58 a decrease in bone density, which causes the progression of alveolar bone

59 resorption, a symptom of periodontal disease [4]. Therefore, with age, women

60 are at a greater risk of developing periodontal disease than men [4].

61 It is important to prevent periodontal disease because it is known to affect

62 systemic diseases such as cardiovascular disease [5], diabetes mellitus [6, 7],

63 and metabolic syndrome [8] and premature/low-birth-weight delivery [9, 10].

64 Previous studies assessing the causes and etiology of periodontal disease

65 mainly focused on oral microbes and surrounding host environment [11, 12].

66 Previously reported environmental factors predisposing the host to periodontal

67 disease include smoking habits, drinking habits [13], and dental hygiene [14].

68 In addition, the nutrients and food consumed have also been reported to

69 be correlated with periodontal disease. Shariq Najeeb *et al.* suggested that

70 decreased consumption of vitamins and minerals, particularly vitamin C, which

71 has antioxidant activity, was highly associated with periodontal disease;

72 however, vitamin C supplementation was not effective in treating periodontal

73 disease [15]. Varun Kulkarni *et al.* showed a similar intake of particular nutrients

74 in patients with and without periodontal disease. However, they pointed to a

75 possible correlation between consumed nutrients and periodontal disease status

76 [16]. In addition, Yoshihara *et al.* showed a negative correlation between the

77 intake of green and yellow vegetables and periodontal disease prevalence.

78 However, it has also been reported that a high intake of cereals, nuts, sugar,

79 sweets, and candy is positively correlated with the presence of periodontal

80 disease [17]. As described above, most of the previous studies on the effect of

81 diet/nutrient targeted elderly patients, with very few studies targeting the young

82 adults.

83           Our foods are divided into relatively hard foods and soft foods based on  
84   physical properties. The hardness of food is regarded as the difficulty involved in  
85   chewing, hereafter referred to as dietary hardness. Dietary hardness has been  
86   assessed as an estimate of masticatory muscle activity for the habitual diet [28].  
87   A positive correlation between dietary hardness and chewing muscle activity has  
88   also been reported in a previous study [18].

89           Therefore, we aimed at assessing the correlation between dietary habits  
90   and periodontal disease in young adult women. In addition, we assessed the  
91   correlation between the intake of hard foods and periodontal disease.

92

93

## 94   **2. Materials and Methods**

### 95   **2.1. Participants**

96   One hundred and twenty-seven female college students from the Tokyo Medical  
97   and Dental University and the Tokyo Healthcare University were recruited for the  
98   study between February 2014 to March 2015.

99   The inclusion criteria were not having caries teeth and missing teeth excluding  
100   third molars. On the other hand, the exclusion criteria were in the following; a

101 smoker, taking gastrointestinal disease drugs, dry mouth, impaired oral  
102 movement and psychiatric illness.

103 After 6 smokers and 1 person taking gastrointestinal disease drugs were  
104 excluded, 120 subjects (mean age, 20.4 years) were finally enrolled in the study.

105 One dentist with  $\geq 5$  years of experience in clinical trials assessed the subjects  
106 for periodontal disease. Two other evaluators practiced the chewing gum and  
107 gummy jelly tests in advance so that their results matched. The Ethical  
108 Committee of the Tokyo Medical and Dental University (#1002) and Tokyo  
109 Healthcare University (#25-8) approved the study protocols. All participants  
110 provided written informed consent before enrolment in the study, and  
111 experiments were performed following the guidelines in the Helsinki Declaration  
112 on the use of human subjects for research.

113

## 114 **2.2. Dietary assessment**

115 Nutrient/food intake was measured using the self-administered diet history  
116 questionnaire (DHQ). The validity and reliability of the DHQ have previously  
117 been confirmed [19, 20]. The DHQ includes questions concerning the frequency  
118 of consumption, the semi-quantitative portions of 151 food and beverage items

119 consumed, general eating habits including skipping meals and eating irregularly,  
120 use of dietary supplements, and major cooking methods. An *ad hoc* of food  
121 composition in Japan was used to calculate the estimated dietary intake of  
122 energy, food group items, and nutrients [21]. The nutrient/food intake was  
123 converted to intake per 1,000 kcal of consumed energy. Since the total intake  
124 was expected to vary with body size, physical activity, and energy intake the  
125 nutrient/food intake was adjusted for total energy by using energy density (per  
126 1,000 kcal) [22].

127

### 128 **2.3. Estimation of dietary hardness**

129 Dietary hardness was calculated using a previously described method [23]. Each  
130 food intake was multiplied by each masticatory muscle's activity for the habitual  
131 diet. Subsequently, dietary hardness was obtained by dividing the total sum of  
132 the above value-by the energy intake.

133

### 134 **2.4. Periodontal disease variables**

135 Each participant underwent assessments for periodontics according to the  
136 Community Periodontal Index (CPI) from code 0 to code 4 (code 0: health



137 periodontal conditions; code 1: gingival bleeding on probing; code 2: calculus  
138 and bleeding; code 3: periodontal pocket 4–5 mm; and code 4: periodontal  
139 pocket  $\geq 6$  mm) [24, 25]. Then, the participants were assigned to two groups,  
140 namely, non-periodontal disease (non-PD) group for CPI codes 0-2 and  
141 periodontal disease (PD) group for CPI codes 3-4.

142

## 143 **2.5. Anthropometry**

144 Age and self-reported body heights were obtained from the DHQ. The weight  
145 and percentage of body fat were measured using a body composition meter  
146 (Inner scan 50, TANITA corporation, Japan). Body mass index (BMI) was  
147 calculated as body weight (kilograms) divided by the square of body height  
148 (meters).

149

## 150 **2.6. Measuring masticatory performance by using color-changeable**

### 151 **chewing gum and gummy jelly test**

152 Mixing ability was measured using a color-changeable chewing gum  
153 (Masticatory Performance Evaluating Gum XYLITOL, Lotte Co., Ltd, Tokyo  
154 Japan). After mouth-rinsing with water for 15 seconds, the participants were then

155 allowed to chew the provided gum by free chewing at a rate of one stroke per  
156 second with an electric metronome. The participants chewed the gum for 60  
157 strokes. Changes in color were assessed using a colorimeter (CR-13,  
158 Konica-Minolta sensing, Tokyo, Japan), and then the mean values of  $L^*$ ,  $a^*$ , and  
159  $b^*$  in the CIELAB color system were measured. Thereafter, the  $\Delta E$  values were  
160 obtained using following the equation [26, 27].

$$161 \quad \Delta E = \sqrt{(L^* - 72.3)^2 + (a^* + 14.9)^2 + (b^* - 33.0)^2}$$

162 Comminution test was measured using a test gummy jelly (UHA Mikakuto Co.,  
163 Ltd, Japan) and a reported scoring method [28]. The participants chewed the  
164 test jelly on their preferred chewing side for a total of 30 strokes. Subsequently,  
165 the chewed test jellies were evaluated on a scale of one to ten by using a visual  
166 scoring method [29]. Higher scores represented better comminution.

167

## 168 **2.7. Health-related QoL**

169 The general health-related QoL of the participants was evaluated by using the  
170 Health-related quality of life scale, Short Form-8 (SF-8) [30, 31, 32].

171

## 172 **2.8. Statistical analyses**

173 Age, height, weight, BMI, body fat percentage, nutrient/food intake, dietary  
174 hardness, masticatory performance, and health-related QoL were compared  
175 between the two groups by using Student's *t*-test or Mann-Whitney U test. JMP  
176 Pro 11.0.0 (SAS) software was used for analyses.  $P < 0.05$  was considered  
177 statistically significant. Except for physical status, dietary hardness, and QoL, all  
178 the other variables were log-transformed to achieve a normal distribution.

179

180

### 181 **3. Results**

#### 182 **3.1. Characteristics of participants**

183 The mean age, body fat percentage, weight, height, and BMI of each group are  
184 shown in Table 1. The average age of the participants was  $20.4 \pm 1.1$  years.  
185 Seventy-one subjects were assigned to the non-PD group, and 49 subjects were  
186 assigned to the PD group. There was no significant difference in age, height,  
187 weight, percentage body fat, and BMI between the two groups.

188

189

**Table 1. The character of participants.**

|                           |                   | Total |     | non-PD |     | PD    |     | <i>p</i> |
|---------------------------|-------------------|-------|-----|--------|-----|-------|-----|----------|
|                           |                   | Mean  | SD  | Mean   | SD  | Mean  | SD  |          |
| Age <sup>2)</sup>         | yrs               | 20.4  | 1.1 | 20.4   | 1.1 | 20.3  | 1.1 | 0.10     |
| Body height <sup>2)</sup> | cm                | 158.9 | 5.8 | 158.4  | 5.3 | 159.0 | 6.3 | 0.91     |
| Body weight <sup>1)</sup> | kg                | 51.2  | 6.9 | 51.2   | 7.4 | 51.1  | 6.2 | 0.89     |
| BMI <sup>2)</sup>         | kg/m <sup>2</sup> | 20.3  | 2.4 | 20.4   | 2.6 | 20.2  | 2.0 | 0.78     |
| Body fat <sup>1)</sup>    | %                 | 27.0  | 5.2 | 27.0   | 5.8 | 27.0  | 4.1 | 0.97     |

Total n=120; non-PD n=71; PD n=49

1) Student's t-test

2) Mann-Whitney U test

190

### 191 **3.2. Intake of nutrients**

192 Table 2 shows the results of the intake of nutrients. A comparison of energy  
193 intake and protein, fat, and carbohydrate energy ratio did not show a significant  
194 difference between the two groups. The intake of minerals such as potassium,  
195 calcium, magnesium, and iron was significantly lower in the PD group. Moreover,  
196 the intake of fat-soluble vitamins, including vitamin A, beta-carotene  
197 equivalence, vitamin E, and vitamin K, was significantly lower in the PD group.  
198 The intake of water-soluble vitamins, including pantothenic acid (vitamin B5),  
199 vitamin B6, and folic acid (vitamin B9), were also significantly lower in the PD  
200 group.

201

202

**Table 2. Nutrient intake in the PD and non-PD groups.**

|                                       |             | Total |      | non-PD |      | PD    |      | <i>p</i> |
|---------------------------------------|-------------|-------|------|--------|------|-------|------|----------|
|                                       |             | Mean  | SD   | Mean   | SD   | Mean  | SD   |          |
| Energy <sup>1)</sup>                  | kcal/day    | 1769  | 403  | 1806   | 431  | 1715  | 356  | 0.27     |
| Protein <sup>1)</sup>                 | % energy    | 14.1  | 1.9  | 14.3   | 1.9  | 13.8  | 1.8  | 0.16     |
| Fat <sup>2)</sup>                     | % energy    | 30.6  | 5.3  | 31.1   | 5.1  | 29.8  | 5.6  | 0.30     |
| Carbohydrate <sup>1)</sup>            | % energy    | 53.1  | 5.8  | 52.6   | 5.5  | 54.0  | 6.3  | 0.21     |
| Sodium <sup>2)</sup>                  | mg/1000kcal | 2198  | 582  | 2223   | 644  | 2161  | 484  | 0.86     |
| Potassium <sup>2)</sup>               | mg/1000kcal | 1142  | 248  | 1185   | 244  | 1080  | 242  | 0.04*    |
| Calcium <sup>1)</sup>                 | mg/1000kcal | 273   | 90   | 285    | 81   | 256   | 101  | 0.02*    |
| Magnesium <sup>1)</sup>               | mg/1000kcal | 124   | 27   | 128    | 28   | 117   | 25   | 0.02*    |
| Phosphorus <sup>1)</sup>              | mg/1000kcal | 527   | 93.0 | 539    | 91   | 509   | 94   | 0.06     |
| Iron <sup>1)</sup>                    | mg/1000kcal | 3.9   | 0.8  | 4.0    | 0.1  | 3.6   | 0.1  | 0.01*    |
| Zinc <sup>1)</sup>                    | mg/1000kcal | 4.1   | 0.5  | 4.2    | 0.5  | 4.0   | 0.5  | 0.11     |
| Copper <sup>2)</sup>                  | mg/1000kcal | 0.57  | 0.10 | 0.59   | 0.11 | 0.55  | 0.09 | 0.09     |
| Manganese <sup>2)</sup>               | mg/1000kcal | 1.98  | 0.7  | 1.96   | 0.74 | 2.02  | 0.57 | 0.22     |
| Vitamin A <sup>1)</sup>               | µg/1000kcal | 297   | 155  | 325    | 167  | 256   | 128  | 0.007**  |
| Retinol <sup>2)</sup>                 | µg/1000kcal | 141   | 120  | 151    | 132  | 128   | 102  | 0.55     |
| b-Carotene equivalents <sup>1)</sup>  | µg/1000kcal | 1841  | 1004 | 2068   | 1041 | 1515  | 855  | 0.001**  |
| Vitamin D <sup>1)</sup>               | µg/1000kcal | 3.5   | 1.9  | 3.4    | 1.8  | 3.5   | 2.2  | 0.97     |
| Vitamin E <sup>1)</sup>               | mg/1000kcal | 4.5   | 1.1  | 4.7    | 1.2  | 4.1   | 1.0  | 0.002**  |
| Vitamin K <sup>1)</sup>               | µg/1000kcal | 147   | 74   | 162    | 83   | 125   | 53   | 0.004**  |
| Thiamin <sup>1)</sup>                 | mg/1000kcal | 0.46  | 0.10 | 0.47   | 0.10 | 0.44  | 0.12 | 0.13     |
| Riboflavin <sup>2)</sup>              | mg/1000kcal | 0.72  | 0.16 | 0.73   | 0.16 | 0.72  | 0.18 | 0.36     |
| Niacin <sup>1)</sup>                  | mg/1000kcal | 8.0   | 1.9  | 8.1    | 1.7  | 7.9   | 2.1  | 0.66     |
| Vitamin B <sub>6</sub> <sup>1)</sup>  | mg/1000kcal | 0.58  | 0.15 | 0.60   | 0.15 | 0.55  | 0.15 | 0.03*    |
| Vitamin B <sub>12</sub> <sup>1)</sup> | µg/1000kcal | 3.0   | 1.2  | 3.0    | 1.2  | 3.0   | 1.3  | 0.75     |
| Folic acid <sup>1)</sup>              | µg/1000kcal | 158   | 44   | 167    | 47   | 144   | 35   | 0.006**  |
| Pantothenic acid <sup>2)</sup>        | mg/1000kcal | 3.19  | 0.55 | 3.28   | 0.55 | 3.05  | 0.53 | 0.01*    |
| Vitamin C <sup>1)</sup>               | mg/1000kcal | 50    | 22   | 52     | 22   | 48    | 22   | 0.25     |
| Fatty acid <sup>2)</sup>              | g/1000kcal  | 29.63 | 5.40 | 30.16  | 5.29 | 28.85 | 5.52 | 0.39     |
| Saturated <sup>1)</sup>               | g/1000kcal  | 9.87  | 2.12 | 9.96   | 2.15 | 9.74  | 2.08 | 0.33     |
| Monounsaturated <sup>2)</sup>         | g/1000kcal  | 12.02 | 2.63 | 12.21  | 2.52 | 11.73 | 2.79 | 0.38     |
| Polyunsaturated <sup>2)</sup>         | g/1000kcal  | 7.45  | 1.60 | 7.67   | 1.55 | 7.12  | 1.63 | 0.12     |

|                                       |             |      |      |      |      |      |      |            |
|---------------------------------------|-------------|------|------|------|------|------|------|------------|
| n-3 Polyunsaturated <sup>2)</sup>     | g/1000kcal  | 1.28 | 0.36 | 1.30 | 0.35 | 1.25 | 0.38 | 0.50       |
| n-6 Polyunsaturated <sup>2)</sup>     | g/1000kcal  | 6.27 | 1.31 | 6.48 | 1.26 | 5.95 | 1.31 | 0.06       |
| Cholesterol <sup>2)</sup>             | mg/1000kcal | 173  | 61   | 177  | 69   | 167  | 49   | 0.67       |
| Total dietary fiber <sup>1)</sup>     | g/1000kcal  | 6.7  | 1.8  | 7.1  | 1.7  | 6.1  | 1.8  | < 0.001*** |
| Soluble dietary fiber <sup>1)</sup>   | g/1000kcal  | 1.7  | 0.5  | 1.8  | 0.4  | 1.6  | 0.6  | 0.003**    |
| Insoluble dietary fiber <sup>1)</sup> | g/1000kcal  | 4.7  | 1.3  | 5.0  | 1.3  | 4.3  | 1.2  | < 0.001*** |

Total n=120; non-PD n=71; PD n=49

1) Student's t-test

2) Mann-Whitney U test

\*P<0.05, \*\*P<0.01, \*\*\*P<0.001

203

204

### 205 **3.3. Intake of different food groups**

206 The results of food intake per 1000 kcal of energy for each group are shown in  
207 Table 3. The intake of green and yellow vegetables and other vegetables was  
208 significantly lower in the PD group than in the non-PD group. Although there was  
209 no significant difference in the intake of seeds, nuts, and beans, their intake was  
210 lower in the PD group. In addition, the intake of sugar, animal fats, and  
211 beverages was higher in the PD group. When green and yellow vegetables and  
212 other vegetables were analyzed (Table 4), the intake of carrots (among green  
213 and yellow vegetables) and the intake of cabbage (among other vegetables)  
214 were significantly lower in the PD group than in the non-PD group. Furthermore,  
215 although there was no significant difference, the intake of broccoli, as a green

216 and yellow vegetable, and that of cucumber, eggplant, and lotus root, as a part

217 of the other vegetables, were lower in the PD group.

218

219

**Table 3. Food intake per 1000 kcal in the PD and non-PD groups.**

g/1,000kcal

|                                           | Total |       | non-PD |       | PD    |       | <i>p</i> |
|-------------------------------------------|-------|-------|--------|-------|-------|-------|----------|
|                                           | Mean  | SD    | Mean   | SD    | Mean  | SD    |          |
| Cereals <sup>2)</sup>                     | 204.3 | 58.2  | 197.9  | 59.2  | 213.5 | 56.2  | 0.19     |
| Nuts and seeds <sup>2)</sup>              | 1.1   | 2.5   | 1.2    | 2.6   | 0.9   | 2.2   | 0.09     |
| Potatoes <sup>2)</sup>                    | 13.9  | 8.4   | 14.8   | 8.4   | 12.7  | 8.4   | 0.06     |
| Sugars <sup>2)</sup>                      | 6.2   | 3.0   | 6.1    | 2.6   | 6.3   | 3.6   | 0.86     |
| Confectioneries <sup>2)</sup>             | 51.4  | 25.1  | 51.3   | 25.3  | 51.6  | 25.1  | 0.89     |
| Animal fat <sup>2)</sup>                  | 0.5   | 0.7   | 0.4    | 0.5   | 0.6   | 0.8   | 0.20     |
| Vegetable fats and oil <sup>2)</sup>      | 12.4  | 8.5   | 12.4   | 8.3   | 12.4  | 9.0   | 0.59     |
| Pulses <sup>1)</sup>                      | 38.2  | 41.1  | 42.9   | 48.4  | 31.5  | 26.2  | 0.17     |
| Fruits <sup>2)</sup>                      | 45.6  | 38.1  | 46.7   | 41.6  | 43.9  | 32.6  | 0.93     |
| Green and yellow vegetables <sup>1)</sup> | 61.4  | 35.9  | 68.5   | 38.5  | 51.2  | 29.4  | 0.01*    |
| Other vegetables <sup>1)</sup>            | 61.6  | 34.4  | 67.3   | 37.7  | 53.3  | 27.5  | 0.02*    |
| Mushrooms <sup>2)</sup>                   | 7.3   | 7     | 7.3    | 6.5   | 7.4   | 8.7   | 0.21     |
| Seaweeds <sup>2)</sup>                    | 7.4   | 7.3   | 7.6    | 6.7   | 7.0   | 8.2   | 0.57     |
| Seasonings <sup>2)</sup>                  | 8.5   | 6.0   | 8.2    | 4.9   | 8.8   | 7.3   | 0.91     |
| Alcoholic beverages <sup>2)</sup>         | 25.3  | 50.8  | 25.9   | 52.7  | 25.6  | 48.5  | 0.58     |
| Beverages <sup>2)</sup>                   | 383.7 | 241.4 | 357.5  | 244.0 | 421.7 | 234.8 | 0.09     |
| Fish <sup>1)</sup>                        | 28.9  | 15.2  | 28.4   | 15.3  | 29.5  | 15.2  | 0.84     |
| Meat <sup>1)</sup>                        | 43.3  | 18.9  | 44.4   | 17.1  | 41.7  | 21.3  | 0.17     |
| Eggs <sup>2)</sup>                        | 19.3  | 13.5  | 20.2   | 15.1  | 18.1  | 10.9  | 0.76     |
| Milk produces <sup>2)</sup>               | 69.3  | 61.6  | 71.4   | 54.9  | 66.2  | 70.8  | 0.28     |

Total n=120; non-PD n=71; PD n=49

1) Student's t-test

2) Mann-Whitney U test

\*P<0.05

220

221



222

**Table 4. Intake of green/yellow and other vegetables in the PD and non-PD groups.**

g/1,000kcal

|                                      | Total |      | non-PD |      | PD   |      | <i>p</i> |
|--------------------------------------|-------|------|--------|------|------|------|----------|
|                                      | Mean  | SD   | Mean   | SD   | Mean | SD   |          |
| <b>Green and yellow vegetables</b>   |       |      |        |      |      |      |          |
| Carrots <sup>2)</sup>                | 8.1   | 5.9  | 9.1    | 5.9  | 6.7  | 5.8  | 0.02*    |
| Pumpkins <sup>2)</sup>               | 3.8   | 5.1  | 4.1    | 5.8  | 3.5  | 4.0  | 0.94     |
| Tomatoes <sup>1)</sup>               | 13.0  | 12.5 | 14.5   | 13.6 | 10.9 | 10.3 | 0.13     |
| Sweet peppers <sup>2)</sup>          | 2.9   | 3.3  | 3.1    | 3.6  | 2.6  | 2.8  | 0.36     |
| Broccoli <sup>2)</sup>               | 6.6   | 9.3  | 7.7    | 10.2 | 5.1  | 7.8  | 0.06     |
| Green leafy vegetables <sup>2)</sup> | 17.7  | 18.5 | 20.8   | 22.3 | 13.3 | 9.5  | 0.15     |
| <b>Other vegetables</b>              |       |      |        |      |      |      |          |
| Cabbage <sup>1)</sup>                | 14.7  | 14.9 | 17.1   | 16.6 | 11.2 | 11.3 | 0.01*    |
| Cucumbers <sup>1)</sup>              | 4.8   | 5.7  | 5.5    | 5.5  | 3.8  | 4.3  | 0.05     |
| Lettuce <sup>2)</sup>                | 6.3   | 5.8  | 7.3    | 6.5  | 5.0  | 4.2  | 0.13     |
| Chinese cabbage <sup>2)</sup>        | 4.4   | 7.4  | 4.4    | 7.5  | 4.4  | 7.2  | 0.73     |
| Bean sprouts <sup>2)</sup>           | 5.4   | 7.1  | 5.7    | 7.0  | 5.0  | 7.2  | 0.60     |
| Radishes <sup>2)</sup>               | 6.4   | 6.0  | 7.0    | 6.5  | 5.6  | 5.2  | 0.43     |
| Onions <sup>1)</sup>                 | 10.9  | 9.5  | 11.3   | 10.2 | 10.3 | 8.6  | 0.59     |
| Cauliflower <sup>2)</sup>            | 0.3   | 0.9  | 0.4    | 1.1  | 0.2  | 0.6  | 0.25     |
| Eggplants <sup>2)</sup>              | 3.4   | 5.4  | 3.6    | 4.0  | 3.1  | 7.1  | 0.06     |
| Burdock <sup>2)</sup>                | 1.7   | 2.3  | 2.0    | 2.8  | 1.2  | 1.1  | 0.12     |
| Lotus root <sup>2)</sup>             | 0.8   | 1.1  | 0.9    | 1.3  | 0.7  | 0.9  | 0.06     |

Total n=120; non-PD n=71; PD n=49

1) Student's t-test

2) Mann-Whitney U test

\*P<0.05

223

### 224 **3.4. Dietary hardness**

225 Masticatory muscle activity was analyzed as a measurement of dietary hardness

226 (Table 5). The results showed that the intake of hard foods was significantly  
227 lower in the PD group when compared with the non-PD.

228

**Table 5. Hard food intake in the PD and non-PD groups.**

m·V/1000kcal

|                                    | Total |      | non-PD |    | PD   |    | <i>p</i> |
|------------------------------------|-------|------|--------|----|------|----|----------|
|                                    | Mean  | SD   | Mean   | SD | Mean | SD |          |
| Intake of hard foods <sup>1)</sup> | 204   | 30.4 | 208    | 31 | 197  | 30 | 0.046*   |

Total n=120; non-PD n=71; PD n=49

1) Student's t-test

\*P<0.05

229

### 230 **3.5. Masticatory performance and health-related QoL**

231 Masticatory performance and QoL are shown in Table 6. There was no  
232 significant difference in mixing ability, comminution ability, and QoL between the  
233 two groups.

234

235

**Table 6. Masticatory performance and health related QoL.**

|                                            | Total |     | non-PD |     | PD   |     | <i>p</i> |  |
|--------------------------------------------|-------|-----|--------|-----|------|-----|----------|--|
|                                            | Mean  | SD  | Mean   | SD  | Mean | SD  |          |  |
| Masticatory Performance                    |       |     |        |     |      |     |          |  |
| Color-changeable chewing gum <sup>1)</sup> | 22.5  | 5.0 | 22.2   | 5.3 | 22.9 | 0.7 | 0.42     |  |
| Gummy jelly test <sup>2)</sup>             | 6.2   | 0.9 | 6.1    | 0.1 | 6.3  | 0.1 | 0.45     |  |
| SF-8 score                                 |       |     |        |     |      |     |          |  |
| Physical component summary <sup>2)</sup>   | 53.4  | 4.4 | 53.2   | 0.5 | 53.8 | 0.6 | 0.52     |  |
| Mental component summary <sup>2)</sup>     | 44.4  | 7.0 | 44.5   | 7.1 | 44.3 | 6.9 | 0.82     |  |

Total n=120; non-PD n=71; PD n=49

1) Student's t-test

2) Mann-Whitney U test

236

237

#### 238 **4. Discussion**

239 In this study, the two groups showed significant differences in the intake of  
240 several nutrients.

241 In previous studies, subjects with periodontal disease significantly  
242 consumed less potassium and iron. In the present study, the intake of potassium  
243 and iron in the PD group was significantly lower than that in the non-PD group,  
244 which was consistent with that reported in previous studies. Magnesium is  
245 known to be involved in bone and tooth formation. It was reported that in  
246 40-year-old individuals, serum magnesium concentration is associated with the

247 risk of periodontal disease [33]. The intake of magnesium was significantly lower  
248 in the PD group in the present study. We, therefore, think that there is a  
249 significant positive correlation between the presence of periodontal disease and  
250 low intake of magnesium in not only the elderly but also in young adults. Both  
251 animal and human studies have reported that a lack of calcium intake leads to  
252 alveolar bone resorption [34, 35] and a decrease in bone density [36], indicating  
253 that insufficient calcium intake might cause the progression of periodontal  
254 disease. In addition, it was shown that the risk of periodontal disease associated  
255 with calcium intake was observed in both men and women aged between 20 and  
256 39 years (odds ratio; 1.99 and 1.84), only in men aged between 40 and 59 years,  
257 and in neither men nor women aged  $\geq 60$  years [37]. In the present study, the  
258 intake of calcium was significantly lower in the PD group. Therefore, we think  
259 that low calcium intake is more strongly correlated with the presence of  
260 periodontal disease in younger adults than in older adults.

261 In the present study, the intake of vitamin C was lower, although not  
262 significantly, in the PD group, while the intake of vitamins A, K, and E and  
263 beta-carotene were significantly lower. Among the elderly and smokers, the  
264 prevalence of periodontal disease was reported to be associated with vitamin C

265 intake. There was a weak but significant dose-response increase in the risk of  
266 periodontal disease in subjects who had lower vitamin C intake [38]. Vitamin C is  
267 known to suppress oxidative stress through its antioxidant activity [39]. In  
268 addition, vitamins A and K [40] and vitamin E and beta-carotene [41] have  
269 antioxidant activity. In previous studies, oxidative stress caused by reactive  
270 oxygen species in the tissues surrounding the gingiva affects the onset of  
271 periodontal disease [42]. Therefore, it was suggested that the antioxidant effect  
272 of several vitamins contributed to the absence of periodontal disease in the  
273 non-PD group. Low intake of folic acid is known to be related to increased  
274 bleeding during probing [43, 44], which supports our findings that the intake of  
275 folic acid was significantly lower in the PD group. In the present study, the intake  
276 of pantothenic acid and vitamin B6, which are not known to have any correlation  
277 with periodontal disease, was significantly lower in the PD group. Previous  
278 reports have shown that decreased vitamin B complex intake reduced the  
279 efficiency of access flap surgery for periodontal disease treatment [45].  
280 However, the effect of each specific vitamin B in the complex on periodontal  
281 disease treatment has not been shown yet. Based on our findings, it was  
282 suggested that there is a positive correlation between the intake of pantothenic

283 acid and vitamin B6, among the vitamin B complex, and the absence of  
284 periodontal disease.

285 In a previous study, there was a significant positive correlation between the  
286 intake of whole grains and the absence of periodontal disease because whole  
287 grains contain dietary fiber [46]. Green and yellow vegetables and other  
288 vegetables like whole grains contain soluble and insoluble dietary fibers.  
289 Therefore, in this study, since the consumption of green/yellow vegetables and  
290 other vegetables was higher in the non-PD group than in the PD group, we think  
291 that dietary fibers play a protective role against the development of periodontal  
292 disease.

293 It was reported that the risk for periodontal disease among elderly persons  
294 with low intake of docosahexaenoic acid is approximately 1.5 times that among  
295 those with high intake [47]. However, in the present study, there was no  
296 significant difference in the intake of fatty acids between the two groups. N-3  
297 polyunsaturated fatty acids such as docosahexaenoic acid and  
298 eicosapentaenoic acid exert anti-inflammatory effects by blocking intracellular  
299 signaling systems required for producing inflammatory cytokines such as IL-1,  
300 IL-6, and TNF- $\alpha$  [47]. Therefore, the immunological differences between younger

301 adults and the elderly might have caused the difference in the findings between  
302 the present study and previous studies.

303 This study showed that the PD group significantly consumed foods with  
304 lower dietary hardness when compared with the non-PD group. Yanagisawa, *et*  
305 *al.* classified foods into 10 ranks according to chewing muscle activity [18]. In the  
306 study, carrots and cabbage were ranked 8<sup>th</sup> out of 10 (>1400  $\mu\text{V} \cdot \text{sec}$ ) and  
307 carrots, cabbage, and lotus root were ranked 6<sup>th</sup> out of 10 (>1000  $\mu\text{V} \cdot \text{sec}$ ). We  
308 found that the non-PD group routinely consumed hard dietary foods when  
309 compared with the PD group. The quantity of saliva secreted has been reported  
310 to increase proportionally with an increase in chew number, chewing time, or  
311 chewing muscle activity [48]. Saliva washes away residual food particles and  
312 bacteria in the mouth. Saliva also contains lysozyme, amylase, peroxidase, and  
313 the proteins lactoferrin and IgA which possess antibacterial activity [49, 50].  
314 Therefore, we think that eating foods with high dietary hardness (as seen in the  
315 non-PD group) protects against periodontal disease through oral washing and  
316 antibacterial activity resulting from increased saliva secretion.

317 In the present study, the participants in the PD group accounted for 40.8%  
318 of the total participants. The 2016 Survey of Dental Diseases reported that

319 women aged 20 to 24 with periodontal disease accounted for 16.7% of the total  
320 population [3]. Thus, the high prevalence of periodontal disease observed in our  
321 study population is likely because we did not comprehensively diagnose  
322 periodontal disease by using multiple diagnostic methods. Our diagnoses were  
323 based only on the CPI, which might have resulted in the observed high  
324 prevalence.

325 Presently, dietary or nutritional studies assessing how diet/nutrition can be  
326 helpful in the prevention or treatment of periodontal disease are lacking.  
327 Therefore, more studies are required to elucidate the connection between  
328 periodontal disease and diet/nutrition. In addition, longitudinal studies on dietary  
329 habits that effectively prevented or suppressed the progression of periodontal  
330 disease are warranted.

331

332

### 333 **5. Conclusion**

334 Under the limited conditions of the present study, the intake of minerals  
335 (potassium, calcium, magnesium, and iron), fat-soluble vitamins (vitamin A,  
336 beta-carotene, vitamin E, and vitamin K), water-soluble vitamins (pantothenic



337 acid, vitamin B6, and folic acid), and dietary fibers was significantly lower in  
338 young adult women with periodontal disease than in young adult women without  
339 periodontal disease.

340

341

### 342 **Acknowledgments**

343 The authors thank all the participants from the Tokyo Medical and Dental  
344 University and Tokyo Healthcare University.

345

346

### 347 **References**

348 1. Iwasaki M, Manz MC, Moynihan P, Yoshihara A, Muramatsu K,  
349 Watanabe R, et al. Relationship between saturated fatty acids and periodontal  
350 disease. J Dent Res. 2011; 90: 861-867.

351

352 2. Williams RC Jr, Mahan CJ. Periodontal disease and diabetes in young  
353 adults. J Am Med Assoc. 1960; 172: 776-778.

354

355 3. Ministry of Health, Labor and Welfare of Japan. Report on survey of  
356 dental diseases in Japan 2016, Table 21, p23. Available from:  
357 <https://www.mhlw.go.jp/toukei/list/dl/62-28-02.pdf> [accessed September 30,  
358 2018]

359

360 4. Shapiro LF, Freeman K. The relationship between estrogen, estrogen  
361 receptors and periodontal disease in adult women. *J Mich Dent Assoc.* 2014; 96:  
362 40-44.

363

364 5. Teeuw WJ, Slot DE, Susanto H, Gerdes VE, Abbas F, D'Aiuto F, et al.  
365 Treatment of periodontitis improves the atherosclerotic profile: a systematic  
366 review and meta-analysis. *J Clin Periodontol.* 2014; 41: 70-79.

367

368 6. Lalla E, Papapanou PN. Diabetes mellitus and periodontitis: a tale of two  
369 common interrelated diseases. *Nat Rev Endocrinol.* 2011; 7: 738-748.

370

371 7. Morita I, Inagaki K, Nakamura F, Noguchi T, Matsubara T, Yoshii S, et  
372 al. Relationship between periodontal status and levels of glycated hemoglobin. *J*

373 Dent Res. 2012; 91: 161-166.

374

375 8. Shimazaki Y, Saito T, Yonemoto K, Kiyohara Y, Iida M, Yamashita Y.

376 Relationship of metabolic syndrome to periodontal disease in Japanese women:

377 the Hisayama Study. J Dent Res. 2007; 86: 271-275.

378

379 9. Corbella S, Taschieri S, Francetti L, De Siena F, Del Frabro M.

380 Periodontal disease as a risk factor for adverse pregnancy outcomes: a

381 systematic review and meta-analysis of case-control studies. Odontology. 2012;

382 100: 232-240.

383

384 10. Chambrone L, Guglielmetti MR, Pannuti CM, Chambrone LA. Evidence

385 grade associating periodontitis to preterm birth and/or low birth weight: I. A

386 systematic review of prospective cohort studies. J Clin Periodontol. 2011; 38:

387 795-808.

388

389 11. Van Dyke TE, Dave S. Risk factors for periodontitis. J Int Acad

390 Periodontol 2005; 7: 3-7.

391

392 12. Cronin AJ, Claffey N, Stassen LF. Who is at risk? Periodontal disease  
393 risk analysis made accessible for the general dental practitioner. Br Dent J.  
394 2008; 205: 131-137.

395

396 13. Shimazaki Y, Saito T, Kiyohara Y, Kato I, Kubo M, Iida M, et al.  
397 Relationship between drinking and periodontitis: the Hisayama Study. J  
398 Periodontol. 2005; 76: 1534-1541.

399

400 14. Sakki TK, Knuuttila ML, Vimpari SS, Hartikainen MS. Association of  
401 lifestyle with periodontal health. Community Dent Oral Epidemiol. 1995; 23:  
402 155-158.

403

404 15. Najeeb S, Zafar MS, Khurshid Z, Zohaib S, Almas K. The role of  
405 nutrition in periodontal health: an update. Nutrients. 2016; 8; pii: E530. Available  
406 from <https://www.mdpi.com/2072-6643/8/9/530>

407

408 16. Kulkarni V, Bhatavadekar NB, Uttamani JR. The effect of nutrition on

409 periodontal disease: a systematic review. J Calif Dent Assoc. 2014; 42: 302-311.

410

411 17. Yoshihara A, Watanabe, Hanada N, Miyazaki H. A longitudinal study of  
412 the relationship between diet intake and dental caries and periodontal disease in  
413 elderly Japanese subjects. Gerodontology 2009; 26: 130-136.

414

415 18. Yanagisawa Y, Tamura A, Teramoto Y, Akasaka M. A classification of  
416 foods by the amount of masticatory action involved. Shoni Shikagaku Zasshi  
417 1989; 27: 74-84.

418

419 19. Ainamo J, Barmes D, Beagrie G, Cutress T, Martin J, Sardo-Infirri J.  
420 Development of the World Health Organization (WHO) community periodontal  
421 index of treatment needs (CPITN). Int Dent J. 1982; 32: 281-291.

422

423 20. Cutress TW, Ainamo J, Sardo-Infirri J. The community periodontal index  
424 of treatment needs (CPITN) procedure for population groups and individuals. Int  
425 Dent J. 1987; 37: 222-233.

426

- 427 21. Hama Y, Kanazawa M, Minakuchi S, Uchida T, Sasaki Y. Properties of  
428 a color-changeable chewing gum used to evaluate masticatory performance. J  
429 Prosthodont Res. 2014; 58: 102-106.  
430
- 431 22. Willett W and Stampfer MJ. Total energy intake: implications for  
432 epidemiologic analy  
433
- 434 23. Murakami K, Sasaki S, Takahashi Y, Uenishi K, Yamasaki M,  
435 Hayabuchi H, et al. Hardness (difficulty of chewing) of the habitual diet in relation  
436 to body mass index and waist circumference in free-living Japanese women  
437 aged 18-22 y. Am J Clin Nutr. 2007; 86: 206-213.  
438
- 439 24. Sasaki S, Yanagibori R, Amano K. Self-administered diet history  
440 questionnaire developed for health education: a relative validation of the  
441 test-version by comparison with 3-day diet record in women. J Epidemiol 1998;  
442 8: 203-215.  
443
- 444 25. Kobayashi S, Murakami K, Sasaki S, Okubo H, Hirota N, Notsu A, et al.

445 Comparison of relative validity of food group intakes estimated by  
446 comprehensive and brief-type self-administered diet history questionnaires  
447 against 16 d dietary records in Japanese adults. Public Health Nutr. 2011; 14:  
448 1200-1211.

449

450 26. Ministry of Education, Culture, Sports, Science and Technology,  
451 Science and Technology Agency. Standard Table of Food Composition in  
452 Japan: Official Gazette Co-operation of Japan; 2015. Available from:  
453 [http://www.mext.go.jp/en/policy/science\\_technology/policy/title01/detail01/1374](http://www.mext.go.jp/en/policy/science_technology/policy/title01/detail01/1374030.htm)  
454 [030.htm](http://www.mext.go.jp/en/policy/science_technology/policy/title01/detail01/1374030.htm)

455

456 27. Tarkowska A, Katzer L, Ahlers MO. Assessment of masticatory  
457 performance by means of a color-changeable chewing gum. J Prosthodont Res.  
458 2017; 61: 9-19.

459

460 28. Yasui S, Nokubi T, Yoshimuta Y, Nokubi F, Kusunoki C, Kida M, et al.  
461 Study on reliability for clinical application of a masticatory performance scoring  
462 method using test gummy jelly. J Masticat & Health Soc. 2012; 22: 11-17.

463

464 29. Nokubi T, Yoshimuta Y, Nokubi F, Yasui S, Kusunoki C, Ono T, et al.  
465 Validity and reliability of a visual scoring method for masticatory ability using test  
466 gummy jelly. *Gerodontology*. 2013; 30: 76-82.

467

468 30. Miyashita M, Yamaguchi A, Kayama M, Narita Y, Kawada N, Akiyama  
469 M, et al. Validation of the Burden Index of Caregivers (BIC), a multi-dimensional  
470 short care burden scale from Japan. *Health Qual Life Outcomes*. 2006; 4: 52.

471

472 31. Sugimoto M, Takegami M, Suzukamo Y, Fukuhara S, Kakehi Y.  
473 Health-related quality of life in Japanese men with localized prostate cancer:  
474 assessment with the SF-8. *Int J Urol*. 2008; 15: 524-528.

475

476 32. Fukuhara S, Suzukamo Y. *Manual of the SF-8 Japanese Version*.  
477 Institute for Health Outcomes and Process Evaluation Research, Kyoto. 2004.

478

479 33. Meisel P, Schwahn C, Luedemann J, John U, Kroemer HK, Kocher T.  
480 Magnesium deficiency is associated with periodontal disease. *J Dent Res*. 2005;



481 84: 937-941.

482

483 34. Aral K., Alkan BA., Saraymen R., Yay A., Şen A., Önder GÖ.

484 Therapeutic effects of systemic vitamin K2 and vitamin D3 on gingival

485 inflammation and alveolar bone in rats with experimentally induced periodontitis.

486 J Periodontol. 2015; 86: 666-673.

487

488 35. Gong A, Chen J, Wu J, Li J, Wang L, Goltzman D, et al.

489 1,25-Dihydroxyvitamin D deficiency accelerates alveolar bone loss independent

490 of aging and extracellular calcium and phosphorus. J Periodontol. 2018; 89:

491 983-994.

492

493 36. Song CH, Barrett-Connor E, Chung JH, Kim SH, Kim KS. Associations

494 of calcium and magnesium in serum and hair with bone mineral density in

495 premenopausal women. Biol Trace Elem Res. 2007; 118: 1-9.

496

497 37. Nishida M, Grossi SG, Dunford RG, Ho AW, Trevisan M, Genco RJ.

498 Calcium and the risk for periodontal disease. J Periodontol. 2000; 71:

499 1057-1066.

500

501 38. Nishida M, Grossi SG, Dunford RG, Ho AW, Trevisan M, Genco RJ.

502 Dietary vitamin C and the risk for periodontal disease. *J Periodontol.* 2000; 71:

503 1215-1223.

504

505 39. Washko P, Rotrosen D, Levine M. Ascorbic acid in human neutrophils. *J*

506 *Biol Chem.* 1993; 268: 15531-15535.

507

508 40. Khmelevskii IuV, Danilevskii NF, Borisenko AV, Poberezkina NV. Effect

509 of vitamins A, E, and K on the indices of the glutathione antiperoxide system in

510 gingival tissues in periodontitis. *Vopr Pitan.* 1985; 4: 54-56.

511

512 41. Moynihan PJ. The role of diet and nutrition in the etiology and

513 prevention of oral diseases. *Bull World Health Organ.* 2005; 83: 694–699.

514

515 42. Battino M, Bullon P, Wilson M, Newman H. Oxidative injury and

516 inflammatory periodontal diseases: the challenge of anti-oxidants to free radicals

517 and reactive oxygen species. Crit Rev Oral Biol Med. 1999;10: 458-476

518

519 43. Erdemir EO Bergstrom J. Effect of smoking on folic acid and vitamin  
520 B12 after nonsurgical periodontal intervention. J Clin Periodontol. 2007; 34:  
521 1074-1081.

522

523 44. Esaki M, Morita M, Akhter R, Akino K, Honda O. Relationship between  
524 folic acid intake and gingival health in non-smoking adults in Japan. Oral Dis.  
525 2010; 16: 96-101.

526

527 45. Neiva RF, Al-Shammari K, Nociti FH Jr., Soehren S, Wang HL. Effects  
528 of vitamin-B complex supplementation on periodontal wound healing. J.  
529 Periodontol. 2005; 76: 1084–1091.

530

531 46. Nielsen SJ, Trak-Fellermeier MA, Joshipura K, Dye BA. Dietary fiber  
532 intake is inversely associated with periodontal disease among US adults. J Nutr.  
533 2016; 146: 2530-2536.

534

535 47. Iwasaki M, Yoshihara A, Moynihan P, Watanabe R, Taylor GW,  
536 Miyazaki H. Longitudinal relationship between dietary  $\omega$ -3 fatty acids and  
537 periodontal disease. *Nutrition* 2010; 26: 1105-1109.

538

539 48. Yanagisawa Y, Wakabayashi T. The effect of difference in physical  
540 property of cooked rice upon digestive speed of starch. *J Masticat & Health Soc.*  
541 1991; 1: 45-52.

542

543 49. Tenovuo JO. *Human saliva: Clinical chemistry and microbiology*. CRC  
544 press; 1998.

545

546 50. Edgar M, Dawes C, O'Mullane D. *Saliva and oral health*. 3th ed.  
547 Stephen Hancocks Ltd; 2004.
